# Supplementary material for: Assessing the global contribution of marine, terrestrial bioaerosols, and desert dust to ice-nucleating particle concentrations
Source: Copernicus journal article supplement (doi:10.5194/egusphere-2024-952), 2024-04-19
Supplement: Supplementary file 1 [file egusphere-2024-952-supplement.pdf]

1 Supplementary

2 Supplementary Figures

3

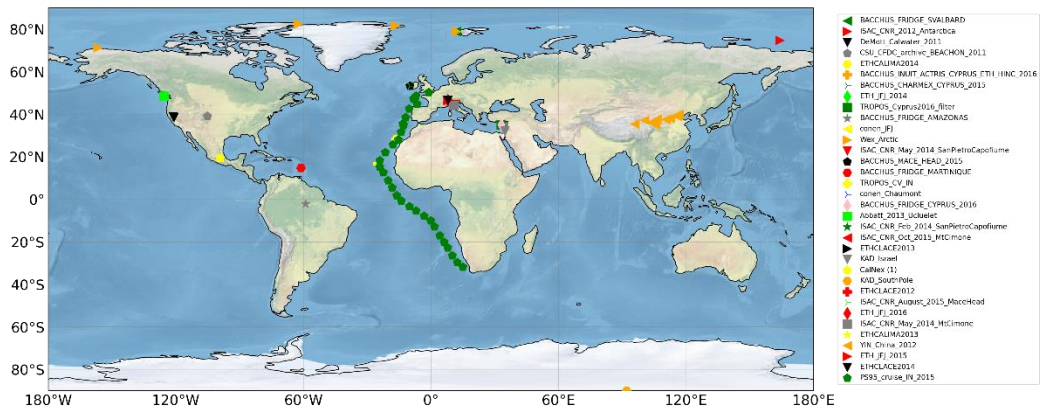

4

5 **Figure S1:** Location of the data used for comparison in Figure 4. For further information see Table S1.

6

7

8

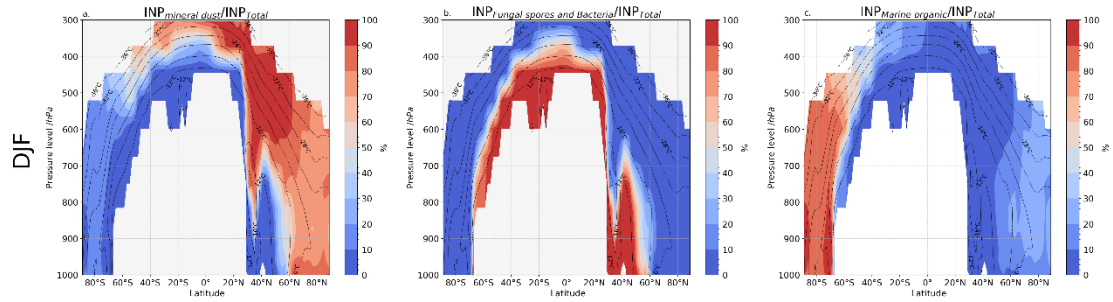

9

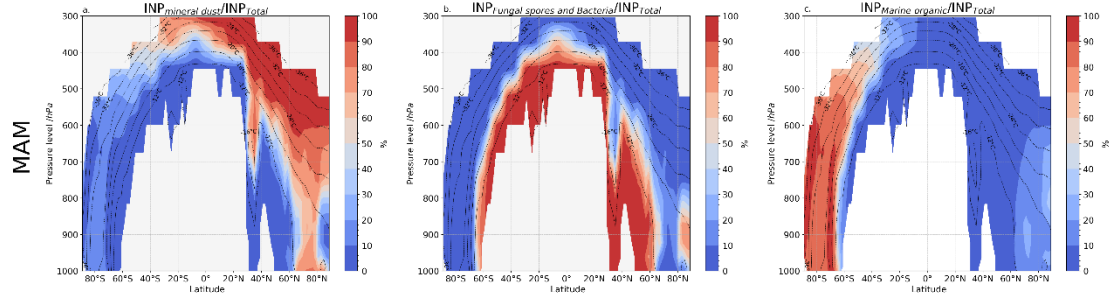

10

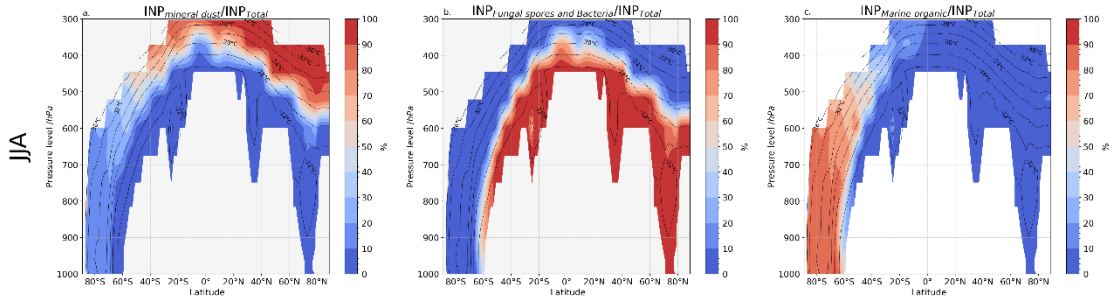

11

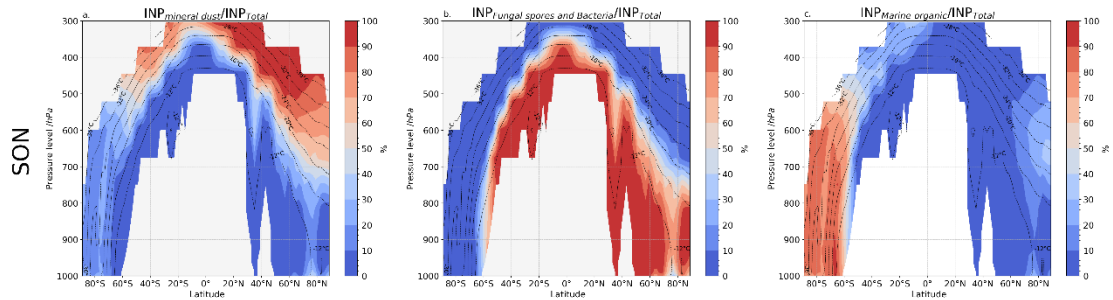

12

13 **Figure S2:** This figure depicts the seasonal percentage contribution of a) mineral dust, (b) fungal spores and bacteria  
14 and (c) marine organic aerosols calculated by TM4-ECPL where the total  $[INP]_{ambient}$  concentration is larger than  
15  $0.01m^{-3}$ . The black contour lines represent seasonal mean isotherms in degrees centigrade.

16

17

18

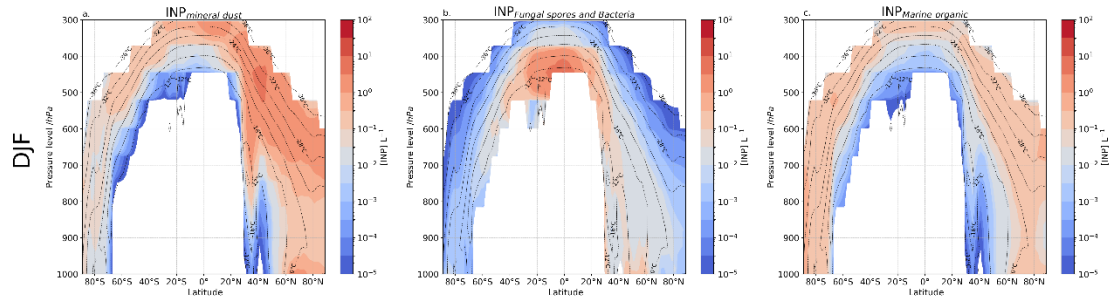

19

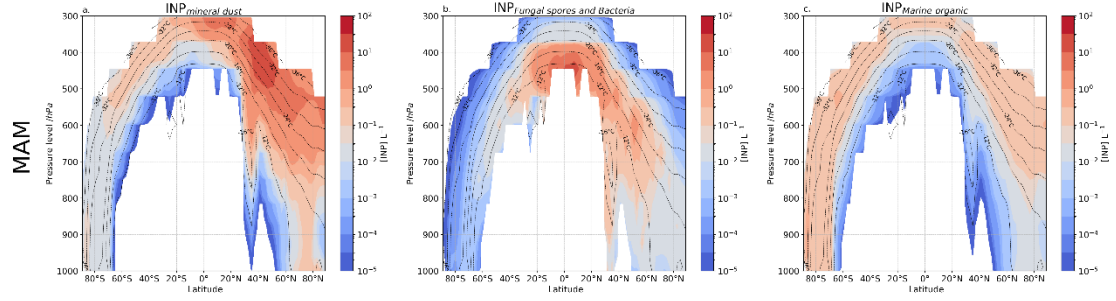

20

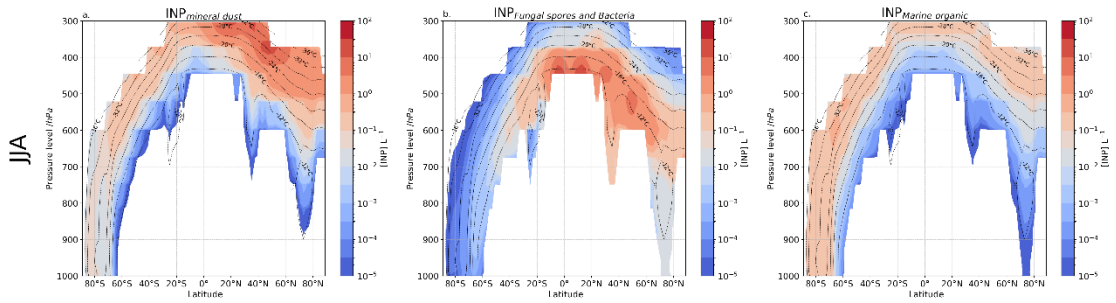

21

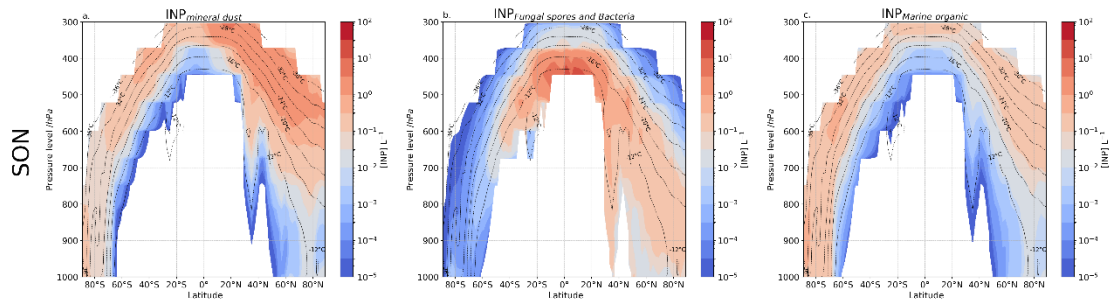

22 **Figure S3:** This figure depicts the seasonal concentration of a) mineral dust, (b) fungal spores and (c)  
23 marine organic aerosols calculated by TM4-ECPL where the total  $[INP]_{ambient}$  concentration is larger than  $0.01 m^{-3}$ .  
24 The black contour lines represent seasonal mean isotherms in degrees centigrade.

25

26

| <i>Campaign/data set</i>                      | <i>Location</i>                       | <i>References</i>                 |
|-----------------------------------------------|---------------------------------------|-----------------------------------|
| <i>Arctic station Barrow/Utqiagvik</i>        | Arctic                                | (Wex et al., 2019)                |
| <i>Alert (Canadian Arctic Station)</i>        | Arctic                                |                                   |
| <i>Arctic station Ny-Ålesund</i>              | Arctic                                |                                   |
| <i>Station_Nord (Villum Research Station)</i> | Arctic                                |                                   |
| <i>PS95 Atlantic Cruise 2015</i>              | Atlantic                              | (Welti et al., 2020)              |
| <i>KAD_Israel</i>                             | Tel Aviv                              | (Ardon-Dryer and Levin, 2014)     |
| <i>KAD_South_Pole</i>                         | South Pole                            | (Ardon-Dryer et al., 2011)        |
| <i>Conen_Chaumont</i>                         | Jungfrauoch and Chaumont              | (Conen et al., 2015)              |
| <i>CYPRUS BACCHUS/CHARMEX 2015</i>            | Forestry Department site, Agia Marina | (Ansmann et al., 2019)            |
| <i>BACCHUS_FRIDGE</i>                         | Amazonian Tall                        | (Schrod et al., 2020)             |
| <i>AMAZONAS</i>                               | Tower Observatory                     |                                   |
| <i>CalWater</i>                               | Coastal California, Airborne          | (Fan et al., 2014)                |
| <i>Conen_JFJ</i>                              | Jungfrauoch                           | (Conen et al., 2015)              |
| <i>CLACE2014</i>                              | Jungfrauoch                           | (Lacher et al., 2021, 2018, 2017) |
| <i>CLACE2013</i>                              | Jungfrauoch                           | (Boose et al., 2016)              |
| <i>CLACE2012</i>                              | Jungfrauoch                           |                                   |
| <i>CalNex</i>                                 | California                            | (Wang et al., 2012)               |
| <i>CALIMA 2014</i>                            | Izana observatory, Tenerife           | (Boose et al., 2016)              |
| <i>CALIMA 2013</i>                            | Izana observatory, Tenerife           | (Boose et al., 2016)              |
| <i>ISAC-CNR MaceHead</i>                      | Mace Head                             | (Rinaldi et al., 2016)            |
| <i>BACCHUS Campaign</i>                       | Observatory, Carna, Galway, Ireland   |                                   |
| <i>ISAC-CNR SanPietro_Capofiume</i>           | San Pietro                            | (Belosi et al., 2017)             |
| <i>BACCHUS Campaign</i>                       | Capofiume (BO, Italy)                 |                                   |
| <i>ISAC_CNR_MtCimone</i>                      | mountain                              | (Rinaldi et al., 2017)            |
| <i>BACCHUS Campaign</i>                       | observatory Mt. Cimone                |                                   |
| <i>ISAC-CNR Antarctica</i>                    | Mario Zucchelli                       | (Belosi et al., 2014)             |
| <i>BACCHUS Campaign</i>                       | Station, Terranova Bay, Antarctica    |                                   |
| <i>BACCHUS_FRIDGE_SVALBARD</i>                | Zeppelin                              | (Schrod et al., 2020)             |
| <i>Campaign</i>                               | Observatory, Svalbard/Spitzbergen     |                                   |

|                                  |                                                                                |                                             |
|----------------------------------|--------------------------------------------------------------------------------|---------------------------------------------|
| <i>BACCHUS_FRIDGE_MARTINIQUE</i> | Volcanic and Seismologic Observatory, Fonds-Saint-Denis, Martinique, Caribbean | (Schrod et al., 2020)                       |
| <i>CSU_CFDC_archive_BEACHON</i>  | Manitou Experimental Forest Observatory (MEFO)                                 | (Tobo et al., 2013)                         |
| <i>ETH_JFJ_2014</i>              | Jungfrauoch High Altitude Research Station                                     | (Lacher et al., 2017)                       |
| <i>ETH_JFJ_2016</i>              | Jungfrauoch High Altitude Research Station                                     | (Lacher et al., 2017, 2018)                 |
| <i>ETH_JFJ_2015</i>              | Jungfrauoch High Altitude Research Station                                     | (Lacher et al., 2017)                       |
| <i>TROPOS_Cyprus2016</i>         | Agia Marina, Xyliatou, Cyprus                                                  | (Ansmann et al., 2019; Schrod et al., 2017) |
| <i>TROPOS_CV_IN</i>              | Cape Verde                                                                     | (Welti et al., 2018)                        |
| <i>Yin_China</i>                 | China                                                                          | (Yin et al., 2012)                          |
| <i>NETCARE_2013</i>              | Coastal (West coast of Canada)                                                 | (Mason et al., 2015)                        |

29

30

31

32 References:

- 33 Ansmann, A., Mamouri, R. E., Bühl, J., Seifert, P., Engelmann, R., Hofer, J., Nisantzi, A., Atkinson, J.  
34 D., Kanji, Z. A., Sierau, B., Vrekoussis, M., and Sciare, J.: Ice-nucleating particle versus ice crystal  
35 number concentration in altocumulus and cirrus layers embedded in Saharan dust: a closure study,  
36 *Atmos. Chem. Phys.*, 19, 15087–15115, <https://doi.org/10.5194/acp-19-15087-2019>, 2019.
- 37 Ardon-Dryer, K. and Levin, Z.: Ground-based measurements of immersion freezing in the eastern  
38 Mediterranean, *Atmos. Chem. Phys.*, 14, 5217–5231, <https://doi.org/10.5194/acp-14-5217-2014>,  
39 2014.
- 40 Ardon-Dryer, K., Levin, Z., and Lawson, R. P.: Characteristics of immersion freezing nuclei at the South  
41 Pole station in Antarctica, *Atmos. Chem. Phys.*, 11, 4015–4024, <https://doi.org/10.5194/acp-11-4015-2011>, 2011.
- 43 Belosi, F., Santachiara, G., and Prodi, F.: Ice-forming nuclei in Antarctica: New and past measurements,  
44 *Atmos. Res.*, 145–146, 105–111, <https://doi.org/10.1016/j.atmosres.2014.03.030>, 2014.
- 45 Belosi, F., Rinaldi, M., Decesari, S., Tarozzi, L., Nicosia, A., and Santachiara, G.: Ground level ice nuclei  
46 particle measurements including Saharan dust events at a Po Valley rural site (San Pietro Capofiume,  
47 Italy), *Atmos. Res.*, 186, 116–126, <https://doi.org/10.1016/j.atmosres.2016.11.012>, 2017.
- 48 Boose, Y., Sierau, B., Isabel García, M., Rodríguez, S., Alastuey, A., Linke, C., Schnaiter, M.,  
49 Kupiszewski, P., Kanji, Z. A., and Lohmann, U.: Ice nucleating particles in the Saharan Air Layer,  
50 *Atmos. Chem. Phys.*, 16, 9067–9087, <https://doi.org/10.5194/acp-16-9067-2016>, 2016.
- 51 Chatziparaschos, M., Daskalakis, N., Myriokefalitakis, S., Kalivitis, N., Nenes, A., Gonçalves Ageitos,  
52 M., Costa-Surós, M., Pérez García-Pando, C., Zanolli, M., Vrekoussis, M., and Kanakidou, M.:  
53 Role of K-feldspar and quartz in global ice nucleation by mineral dust in mixed-phase clouds, *Atmos.*  
54 *Chem. Phys.*, 23, 1785–1801, <https://doi.org/10.5194/acp-23-1785-2023>, 2023.
- 55 Conen, F., Rodríguez, S., Hüglin, C., Henne, S., Herrmann, E., Bukowiecki, N., and Alewell, C.:  
56 Atmospheric ice nuclei at the high-altitude observatory Jungfraujoch, Switzerland, *Tellus, Ser. B*  
57 *Chem. Phys. Meteorol.*, 67, <https://doi.org/10.3402/tellusb.v67.25014>, 2015.
- 58 Fan, J., Leung, L. R., Demott, P. J., Comstock, J. M., Singh, B., Rosenfeld, D., Tomlinson, J. M., White,  
59 A., Prather, K. A., Minnis, P., Ayers, J. K., and Min, Q.: Aerosol impacts on California winter clouds  
60 and precipitation during calwater 2011: Local pollution versus long-range transported dust, *Atmos.*  
61 *Chem. Phys.*, 14, 81–101, <https://doi.org/10.5194/acp-14-81-2014>, 2014.
- 62 Lacher, L., Lohmann, U., Boose, Y., Zipori, A., Herrmann, E., Bukowiecki, N., Steinbacher, M., and  
63 Kanji, Z. A.: The Horizontal Ice Nucleation Chamber HINC: INP measurements at Conditions  
64 Relevant for Mixed-Phase Clouds at the High Altitude Research Station Jungfraujoch, *Atmos. Chem.*  
65 *Phys. Discuss.*, 1–49, <https://doi.org/10.5194/acp-2017-474>, 2017.
- 66 Lacher, L., DeMott, P. J., Levin, E. J. T., Suski, K. J., Boose, Y., Zipori, A., Herrmann, E., Bukowiecki,  
67 N., Steinbacher, M., Gute, E., Abbatt, J. P. D., Lohmann, U., and Kanji, Z. A.: Background Free-  
68 Tropospheric Ice Nucleating Particle Concentrations at Mixed-Phase Cloud Conditions, *J. Geophys.*  
69 *Res. Atmos.*, 123, 10,506–10,525, <https://doi.org/10.1029/2018JD028338>, 2018.
- 70 Lacher, L., Clemen, H. C., Shen, X., Mertes, S., Gysel-Beer, M., Moallemi, A., Steinbacher, M., Henne,  
71 S., Saathoff, H., Mohler, O., Hohler, K., Schiebel, T., Weber, D., Schrod, J., Schneider, J., and Kanji,  
72 Z. A.: Sources and nature of ice-nucleating particles in the free troposphere at Jungfraujoch in winter  
73 2017, *Atmos. Chem. Phys.*, 21, 16925–16953, <https://doi.org/10.5194/acp-21-16925-2021>, 2021.
- 74 Mason, R. H., Si, M., Li, J., Chou, C., Dickie, R., Toom-Sauntry, D., Pöhlker, C., Yakobi-Hancock, J.  
75 D., Ladino, L. A., Jones, K., Leitch, W. R., Schiller, C. L., Abbatt, J. P. D., Huffman, J. A., and

76 Bertram, A. K.: Ice nucleating particles at a coastal marine boundary layer site: Correlations with  
77 aerosol type and meteorological conditions, *Atmos. Chem. Phys.*, 15, 12547–12566,  
78 <https://doi.org/10.5194/acp-15-12547-2015>, 2015.

79 Rinaldi, M., Belosi, F., Nicosia, A., Santachiara, G., Decesari, S., and Cristina, M.: Ice Nucleating  
80 Particles at Mace Head during the 2015 BACCHUS campaign through off-line measurements, 18,  
81 15063, 2016.

82 Rinaldi, M., Santachiara, G., Nicosia, A., Piazza, M., Decesari, S., Gilardoni, S., Paglione, M.,  
83 Cristofanelli, P., Marinoni, A., Bonasoni, P., and Belosi, F.: Atmospheric Ice Nucleating Particle  
84 measurements at the high mountain observatory Mt. Cimone (2165 m a.s.l., Italy), *Atmos. Environ.*,  
85 171, 173–180, <https://doi.org/10.1016/j.atmosenv.2017.10.027>, 2017.

86 Schrod, J., Weber, D., Drücke, J., Keleshis, C., Pikridas, M., Ebert, M., Cvetković, B., Nickovic, S.,  
87 Marinou, E., Baars, H., Ansmann, A., Vrekoussis, M., Mihalopoulos, N., Sciare, J., Curtius, J., and  
88 Bingemer, H. G.: Ice nucleating particles over the Eastern Mediterranean measured by unmanned  
89 aircraft systems, *Atmos. Chem. Phys.*, 17, 4817–4835, <https://doi.org/10.5194/acp-17-4817-2017>,  
90 2017.

91 Schrod, J., Thomson, E. S., Weber, D., Kossmann, J., Pöhlker, C., Saturno, J., Ditas, F., Artaxo, P.,  
92 Clouard, V., Saurel, J. M., Ebert, M., Curtius, J., and Bingemer, H. G.: Long-term deposition and  
93 condensation ice-nucleating particle measurements from four stations across the globe, *Atmos.*  
94 *Chem. Phys.*, 20, 15983–16006, <https://doi.org/10.5194/acp-20-15983-2020>, 2020.

95 Tobo, Y., Prenni, A. J., Demott, P. J., Huffman, J. A., McCluskey, C. S., Tian, G., Pöhlker, C., Pöschl,  
96 U., and Kreidenweis, S. M.: Biological aerosol particles as a key determinant of ice nuclei populations  
97 in a forest ecosystem, *J. Geophys. Res. Atmos.*, 118, 10,100-10,110,  
98 <https://doi.org/10.1002/jgrd.50801>, 2013.

99 Wang, B., Laskin, A., Roedel, T., Gilles, M. K., Moffet, R. C., Tivanski, A. V., and Knopf, D. A.:  
100 Heterogeneous ice nucleation and water uptake by field-collected atmospheric particles below 273  
101 K, *J. Geophys. Res. Atmos.*, 117, 1–15, <https://doi.org/10.1029/2012JD017446>, 2012.

102 Welti, A., Müller, K., Fleming, Z. L., and Stratmann, F.: Concentration and variability of ice nuclei in  
103 the subtropical maritime boundary layer, 5307–5320, 2018.

104 Welti, A., Bigg, E. K., Demott, P. J., Gong, X., Hartmann, M., Harvey, M., Henning, S., Herenz, P., Hill,  
105 T. C. J., Hornblow, B., Leck, C., Löffler, M., McCluskey, C. S., Rauker, A. M., Schmale, J., Tatzelt,  
106 C., and Pinxteren, M. Van: Ship-based measurements of ice nuclei concentrations over the Arctic ,  
107 Atlantic , Pacific and Southern oceans, 15191–15206, 2020.

108 Wex, H., Huang, L., Zhang, W., Hung, H., Traversi, R., Becagli, S., Sheesley, R. J., Moffett, C. E.,  
109 Barrett, T. E., Bossi, R., Skov, H., Hünerbein, A., Lubitz, J., Löffler, M., Linke, O., Hartmann, M.,  
110 Herenz, P., and Stratmann, F.: Annual variability of ice-nucleating particle concentrations at different  
111 Arctic locations, *Atmos. Chem. Phys.*, 19, 5293–5311, <https://doi.org/10.5194/acp-19-5293-2019>,  
112 2019.

113 Yin, J., Wang, D., and Guoqing, Z.: An Evaluation of Ice Nuclei Characteristics from the Long-term  
114 Measurement Data over North China An Evaluation of Ice Nuclei Characteristics from the Long-  
115 term Measurement Data over North China, <https://doi.org/10.1007/s13143-012-0020-8>, 2012.

116
